# Supplementary material
Source: PubMed Central journal article supplement (PMC6691726)
Supplement: NIHMS1031112-supplement-1.pdf [file NIHMS1031112-supplement-1.pdf]

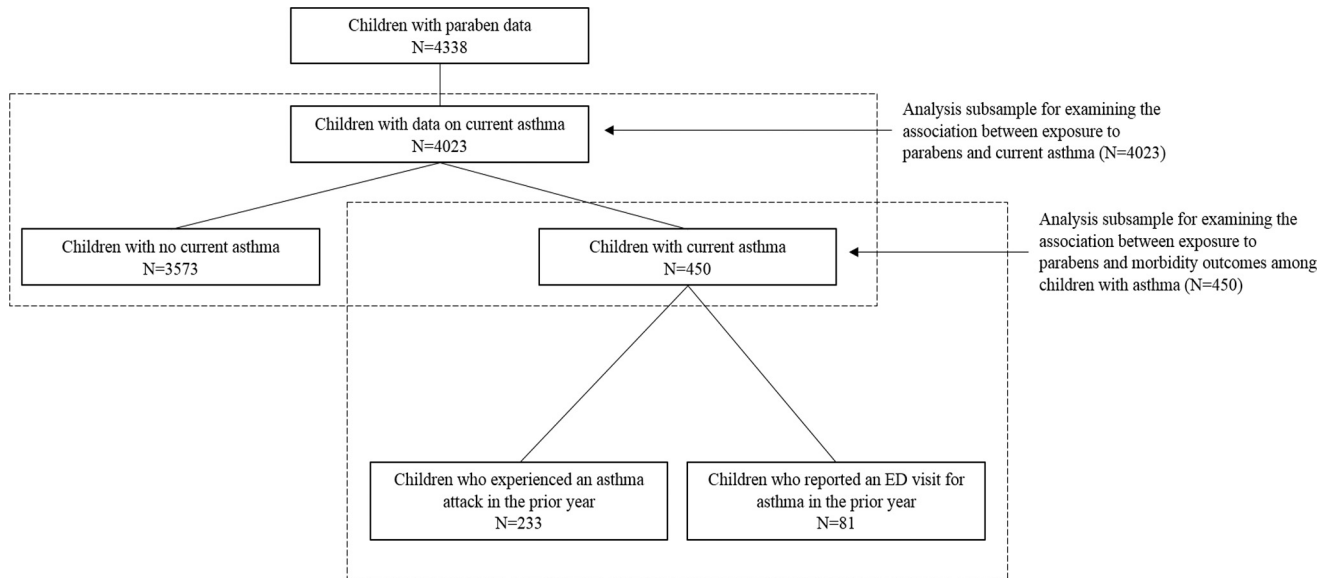

**FIG E1.** Analysis subsamples for examining associations between exposure to parabens and current asthma among all children and with ED visits and asthma attacks among children aged 6 to 19 years with asthma (NHANES 2005-2014).

**TABLE E1.** Associations of exposure to parabens with respiratory morbidity measures among children with asthma and with current asthma prevalence, adjusting for serum cotinine concentrations\*

|                           | Subsample of children with cotinine data (cotinine not in the model), cPOR |           |         | Subsample of children with cotinine data (cotinine not in the model), aPOR |           |         | Subsample of children with cotinine data and cotinine in the model, aPOR |           |         | Stratified results by sex on the subsample of children with cotinine data and cotinine in the models |           |         |                  |           |         |                        |
|---------------------------|----------------------------------------------------------------------------|-----------|---------|----------------------------------------------------------------------------|-----------|---------|--------------------------------------------------------------------------|-----------|---------|------------------------------------------------------------------------------------------------------|-----------|---------|------------------|-----------|---------|------------------------|
|                           | cPOR                                                                       | 95% CI    | P value | aPOR                                                                       | 95% CI    | P value | aPOR                                                                     | 95% CI    | P value | aPOR                                                                                                 | 95% CI    | P value | aPOR             | 95% CI    | P value | P <sub>int</sub> value |
| Morbidity                 |                                                                            |           |         |                                                                            |           |         |                                                                          |           |         | Boys (n = 166)                                                                                       |           |         | Girls (n = 146)  |           |         |                        |
| ED visits (n = 312)       |                                                                            |           |         |                                                                            |           |         |                                                                          |           |         |                                                                                                      |           |         |                  |           |         |                        |
| BP                        | 1.18                                                                       | 0.61-2.31 | .61     | 1.26                                                                       | 0.58-2.73 | .56     | 1.25                                                                     | 0.58-2.72 | .57     | 1.97                                                                                                 | 0.59-6.55 | .26     | 0.90             | 0.35-2.36 | .83     | .32                    |
| EP                        | 1.05                                                                       | 0.50-2.22 | .89     | 1.10                                                                       | 0.49-2.49 | .81     | 1.12                                                                     | 0.50-2.52 | .78     | 1.08                                                                                                 | 0.40-2.96 | .88     | 1.15             | 0.35-3.75 | .82     | .94                    |
| MP                        | 1.01                                                                       | 0.54-1.89 | .97     | 1.03                                                                       | 0.47-2.26 | .93     | 1.03                                                                     | 0.47-2.26 | .94     | 2.86                                                                                                 | 1.31-6.25 | .01†    | 0.50             | 0.18-1.39 | .18     | .003†                  |
| PP                        | 1.00                                                                       | 0.64-1.57 | 1.00    | 1.05                                                                       | 0.53-2.08 | .90     | 1.04                                                                     | 0.52-2.07 | .91     | 2.37                                                                                                 | 1.17-4.79 | .02†    | 0.56             | 0.23-1.40 | .21     | .003†                  |
| Asthma attacks (n = 312)  |                                                                            |           |         |                                                                            |           |         |                                                                          |           |         |                                                                                                      |           |         |                  |           |         |                        |
| BP                        | 1.77                                                                       | 0.91-3.47 | .09     | 2.63                                                                       | 1.31-5.28 | .01†    | 2.64                                                                     | 1.32-5.31 | .01†    | 2.43                                                                                                 | 1.02-5.78 | .04     | 2.81             | 1.03-7.70 | .05     | .83                    |
| EP                        | 0.80                                                                       | 0.43-1.50 | .49     | 1.13                                                                       | 0.58-2.20 | .71     | 1.13                                                                     | 0.58-2.20 | .72     | 0.65                                                                                                 | 0.27-1.57 | .34     | 1.82             | 0.65-5.09 | .25     | .15                    |
| MP                        | 0.69                                                                       | 0.45-1.06 | .09     | 0.80                                                                       | 0.51-1.28 | .35     | 0.81                                                                     | 0.51-1.28 | .36     | 0.81                                                                                                 | 0.47-1.40 | .44     | 0.80             | 0.44-1.46 | .47     | .99                    |
| PP                        | 0.79                                                                       | 0.54-1.17 | .23     | 1.00                                                                       | 0.63-1.59 | 1.00    | 1.00                                                                     | 0.63-1.59 | .99     | 1.14                                                                                                 | 0.69-1.88 | .61     | 0.91             | 0.50-1.65 | .75     | .46                    |
| Prevalence                |                                                                            |           |         |                                                                            |           |         |                                                                          |           |         | Boys (n = 1465)                                                                                      |           |         | Girls (n = 1368) |           |         |                        |
| Current asthma (n = 2833) |                                                                            |           |         |                                                                            |           |         |                                                                          |           |         |                                                                                                      |           |         |                  |           |         |                        |
| BP                        | 0.83                                                                       | 0.59-1.18 | .30     | 0.83                                                                       | 0.58-1.20 | .32     | 0.83                                                                     | 0.58-1.19 | .31     | 1.07                                                                                                 | 0.65-1.76 | .80     | 0.69             | 0.40-1.17 | .16     | .25                    |
| EP                        | 1.15                                                                       | 0.85-1.56 | .37     | 1.10                                                                       | 0.81-1.50 | .54     | 1.11                                                                     | 0.81-1.51 | .52     | 1.09                                                                                                 | 0.66-1.78 | .73     | 1.12             | 0.71-1.77 | .61     | .93                    |
| MP                        | 1.17                                                                       | 0.93-1.46 | .17     | 1.21                                                                       | 0.92-1.59 | .17     | 1.21                                                                     | 0.92-1.60 | .17     | 1.41                                                                                                 | 1.04-1.92 | .03     | 1.03             | 0.70-1.52 | .87     | .16                    |
| PP                        | 1.15                                                                       | 0.96-1.37 | .13     | 1.17                                                                       | 0.95-1.43 | .13     | 1.17                                                                     | 0.95-1.44 | .13     | 1.24                                                                                                 | 0.96-1.59 | .10     | 1.11             | 0.83-1.50 | .47     | .58                    |

BP and EP values are modeled as less than LOD versus LOD or greater, and MP and PP values are modeled as log<sub>10</sub> concentrations in nanograms per milliliter.

cPOR, Crude prevalence odds ratio; P<sub>int</sub>, interaction term P value (sex\*biomarker concentration term).

\*Crude models were adjusted for log<sub>10</sub> creatinine concentrations and multivariable models were adjusted for age in years, sex (except stratified models), poverty income ratio (continuous), race/ethnicity (non-Hispanic white, non-Hispanic black, Mexican American, and other), survey cycle year (2005-2006, 2007-2008, 2009-2010, 2011-2012, and 2013-2014), log<sub>10</sub> creatinine concentrations, and serum cotinine concentrations.

†P < .05.

**TABLE E2.** Associations of exposure to parabens with respiratory morbidity measures among children with asthma and with current asthma, prevalence, adjusting for BMI z scores\*

|                                 | Subsample of children with BMI data (BMI z score not in the model), cPOR |           |                | Subsample of children with BMI data (BMI z score not in the model), aPOR |           |                | Subsample of children with BMI data and BMI z score in the model, aPOR |           |                | Stratified results by sex on the subsample of children with BMI data and BMI z score in the models |           |                |                  |           |                | <i>P</i> <sub>int</sub> |
|---------------------------------|--------------------------------------------------------------------------|-----------|----------------|--------------------------------------------------------------------------|-----------|----------------|------------------------------------------------------------------------|-----------|----------------|----------------------------------------------------------------------------------------------------|-----------|----------------|------------------|-----------|----------------|-------------------------|
|                                 | cPOR                                                                     | 95% CI    | <i>P</i> value | aPOR                                                                     | 95% CI    | <i>P</i> value | aPOR                                                                   | 95% CI    | <i>P</i> value | Boys (n = 247)                                                                                     |           |                | Girls (n = 199)  |           |                |                         |
|                                 |                                                                          |           |                |                                                                          |           |                |                                                                        |           |                | aPOR                                                                                               | 95% CI    | <i>P</i> value | aPOR             | 95% CI    | <i>P</i> value |                         |
| <b>Morbidity</b>                |                                                                          |           |                |                                                                          |           |                |                                                                        |           |                |                                                                                                    |           |                |                  |           |                |                         |
| ED visits (n = 446)             |                                                                          |           |                |                                                                          |           |                |                                                                        |           |                | Boys (n = 247)                                                                                     |           |                | Girls (n = 199)  |           |                |                         |
| BP                              | 1.43                                                                     | 0.78-2.61 | .25            | 1.44                                                                     | 0.73-2.83 | .29            | 1.46                                                                   | 0.75-2.85 | .26            | 2.19                                                                                               | 0.78-6.12 | .14            | 1.04             | 0.45-2.37 | .93            | .27                     |
| EP                              | 1.07                                                                     | 0.56-2.05 | .84            | 1.07                                                                     | 0.52-2.23 | .85            | 1.10                                                                   | 0.52-2.33 | .79            | 1.16                                                                                               | 0.48-2.80 | .74            | 1.06             | 0.36-3.13 | .91            | .90                     |
| MP                              | 1.22                                                                     | 0.70-2.13 | .48            | 1.22                                                                     | 0.63-2.38 | .55            | 1.24                                                                   | 0.65-2.36 | .52            | 2.59                                                                                               | 1.41-4.75 | .003†          | 0.59             | 0.24-1.45 | .25            | .001†                   |
| PP                              | 1.09                                                                     | 0.72-1.66 | .67            | 1.15                                                                     | 0.64-2.07 | .64            | 1.16                                                                   | 0.65-2.05 | .62            | 2.16                                                                                               | 1.22-3.81 | .008†          | 0.62             | 0.28-1.37 | .23            | .002†                   |
| <b>Asthma attacks (n = 446)</b> |                                                                          |           |                |                                                                          |           |                |                                                                        |           |                |                                                                                                    |           |                |                  |           |                |                         |
| BP                              | 1.51                                                                     | 0.85-2.67 | .16            | 1.78                                                                     | 0.93-3.41 | .08            | 1.74                                                                   | 0.92-3.27 | .09            | 1.52                                                                                               | 0.74-3.10 | .25            | 1.94             | 0.76-4.98 | .17            | .67                     |
| EP                              | 0.69                                                                     | 0.41-1.17 | .17            | 0.82                                                                     | 0.46-1.43 | .47            | 0.80                                                                   | 0.45-1.41 | .43            | 0.54                                                                                               | 0.27-1.09 | .09            | 1.15             | 0.46-2.87 | .76            | .21                     |
| MP                              | 0.76                                                                     | 0.55-1.06 | .10            | 0.82                                                                     | 0.56-1.19 | .28            | 0.81                                                                   | 0.55-1.18 | .27            | 0.87                                                                                               | 0.57-1.34 | .53            | 0.75             | 0.43-1.30 | .30            | .62                     |
| PP                              | 0.77                                                                     | 0.55-1.06 | .11            | 0.86                                                                     | 0.59-1.25 | .42            | 0.85                                                                   | 0.59-1.24 | .41            | 0.95                                                                                               | 0.65-1.40 | .80            | 0.77             | 0.45-1.31 | .33            | .43                     |
| <b>Prevalence</b>               |                                                                          |           |                |                                                                          |           |                |                                                                        |           |                |                                                                                                    |           |                |                  |           |                |                         |
| Current asthma (n = 3993)       |                                                                          |           |                |                                                                          |           |                |                                                                        |           |                | Boys (n = 2056)                                                                                    |           |                | Girls (n = 1937) |           |                |                         |
| BP                              | 0.83                                                                     | 0.63-1.08 | .16            | 0.83                                                                     | 0.62-1.11 | .20            | 0.84                                                                   | 0.63-1.11 | .22            | 0.95                                                                                               | 0.64-1.41 | .80            | 0.75             | 0.48-1.19 | .22            | .48                     |
| EP                              | 1.15                                                                     | 0.90-1.48 | .26            | 1.10                                                                     | 0.85-1.42 | .46            | 1.11                                                                   | 0.86-1.43 | .40            | 1.08                                                                                               | 0.74-1.58 | .69            | 1.14             | 0.78-1.67 | .48            | .84                     |
| MP                              | 1.21                                                                     | 1.01-1.45 | .04†           | 1.18                                                                     | 0.95-1.47 | .14            | 1.20                                                                   | 0.96-1.48 | .10            | 1.36                                                                                               | 1.05-1.77 | .02†           | 1.03             | 0.75-1.41 | .87            | .16                     |
| PP                              | 1.21                                                                     | 1.04-1.41 | .01†           | 1.20                                                                     | 1.01-1.44 | .04†           | 1.22                                                                   | 1.02-1.45 | .03†           | 1.25                                                                                               | 1.00-1.56 | .05            | 1.18             | 0.91-1.53 | .21            | .72                     |

BP and EP values are modeled as less than LOD versus LOD or greater, and MP and PP values are modeled as log<sub>10</sub> concentrations in nanograms per milliliter.

cPOR, Crude prevalence odds ratio; *P*<sub>int</sub>, interaction term *P* value (sex\*biomarker concentration term).

\*Crude models were adjusted for log<sub>10</sub> creatinine concentrations, and multivariable models were adjusted for age in years, sex (except stratified models), poverty income ratio (continuous), race/ethnicity (non-Hispanic white, non-Hispanic black, Mexican American, and other), survey cycle year (2005-2006, 2007-2008, 2009-2010, 2011-2012, and 2013-2014), log<sub>10</sub> creatinine concentration, and BMI z score.

†*P* < .05.

**TABLE E3.** Associations of exposure to parabens with respiratory morbidity measures among children with asthma and with current asthma prevalence, adjusting for log<sub>10</sub> triclosan, bisphenol A, and 2,5-dichlorophenol concentrations\*

|                           | All children, cPOR |           |                | All children (adjusting for log <sub>10</sub> triclosan, bisphenol A, and 2,5-dichlorophenol concentrations), aPOR |           |                | Stratified results by sex adjusting for log <sub>10</sub> concentrations of triclosan, bisphenol A, and 2,5-dichlorophenol |           |       |                 |           |     | <i>P</i> <sub>int</sub> value |
|---------------------------|--------------------|-----------|----------------|--------------------------------------------------------------------------------------------------------------------|-----------|----------------|----------------------------------------------------------------------------------------------------------------------------|-----------|-------|-----------------|-----------|-----|-------------------------------|
|                           | cPOR               | 95% CI    | <i>P</i> value | aPOR                                                                                                               | 95% CI    | <i>P</i> value | Boys (n = 248)                                                                                                             |           |       | Girls (n = 202) |           |     |                               |
| Morbidity                 |                    |           |                |                                                                                                                    |           |                |                                                                                                                            |           |       |                 |           |     |                               |
| ED visits (n = 450)       |                    |           |                |                                                                                                                    |           |                |                                                                                                                            |           |       |                 |           |     |                               |
| BP                        | 1.43               | 0.78-2.63 | .24            | 1.36                                                                                                               | 0.67-2.79 | .39            | 2.22                                                                                                                       | 0.78-6.28 | .13   | 0.88            | 0.36-2.12 | .77 | .19                           |
| EP                        | 1.07               | 0.56-2.05 | .84            | 1.06                                                                                                               | 0.52-2.13 | .87            | 1.18                                                                                                                       | 0.48-2.88 | .72   | 0.96            | 0.35-2.62 | .94 | .76                           |
| MP                        | 1.22               | 0.70-2.14 | .48            | 1.24                                                                                                               | 0.65-2.37 | .51            | 2.70                                                                                                                       | 1.42-5.14 | .003† | 0.57            | 0.25-1.30 | .18 | .001†                         |
| PP                        | 1.10               | 0.72-1.66 | .66            | 1.18                                                                                                               | 0.67-2.10 | .56            | 2.24                                                                                                                       | 1.25-4.02 | .01†  | 0.60            | 0.30-1.24 | .17 | .001†                         |
| Asthma attacks (n = 450)  |                    |           |                |                                                                                                                    |           |                |                                                                                                                            |           |       |                 |           |     |                               |
| BP                        | 1.52               | 0.86-2.68 | .15            | 1.81                                                                                                               | 0.93-3.55 | .08            | 1.56                                                                                                                       | 0.76-3.19 | .22   | 2.06            | 0.76-5.58 | .15 | .63                           |
| EP                        | 0.69               | 0.41-1.16 | .16            | 0.82                                                                                                               | 0.47-1.43 | .49            | 0.55                                                                                                                       | 0.27-1.11 | .09   | 1.22            | 0.50-2.98 | .65 | .17                           |
| MP                        | 0.76               | 0.55-1.05 | .09            | 0.81                                                                                                               | 0.56-1.18 | .27            | 0.85                                                                                                                       | 0.56-1.29 | .44   | 0.78            | 0.45-1.33 | .35 | .77                           |
| PP                        | 0.77               | 0.56-1.06 | .11            | 0.86                                                                                                               | 0.59-1.26 | .44            | 0.94                                                                                                                       | 0.64-1.38 | .74   | 0.80            | 0.47-1.36 | .40 | .56                           |
| Prevalence                |                    |           |                |                                                                                                                    |           |                |                                                                                                                            |           |       |                 |           |     |                               |
| Current asthma (n = 4023) |                    |           |                |                                                                                                                    |           |                |                                                                                                                            |           |       |                 |           |     |                               |
| Boys (n = 2068)           |                    |           |                |                                                                                                                    |           |                |                                                                                                                            |           |       |                 |           |     |                               |
| BP                        | 0.82               | 0.63-1.08 | .15            | 0.81                                                                                                               | 0.61-1.08 | .15            | 0.96                                                                                                                       | 0.64-1.42 | .82   | 0.71            | 0.45-1.12 | .14 | .37                           |
| EP                        | 1.14               | 0.89-1.47 | .29            | 1.07                                                                                                               | 0.83-1.38 | .61            | 1.08                                                                                                                       | 0.74-1.58 | .69   | 1.06            | 0.72-1.56 | .77 | .95                           |
| MP                        | 1.21               | 1.01-1.45 | .04†           | 1.16                                                                                                               | 0.93-1.44 | .19            | 1.34                                                                                                                       | 1.03-1.74 | .03†  | 0.98            | 0.71-1.35 | .90 | .12                           |
| PP                        | 1.21               | 1.04-1.41 | .02†           | 1.18                                                                                                               | 0.99-1.41 | .07            | 1.24                                                                                                                       | 0.99-1.55 | .06   | 1.13            | 0.87-1.47 | .37 | .58                           |

BP and EP values are modeled as less than LOD versus LOD or greater, and MP and PP values are modeled as log<sub>10</sub> concentrations in nanograms per milliliter.

cPOR, Crude prevalence odds ratio; *P*<sub>int</sub>, interaction term *P* value (sex\*biomarker concentration term).

\*Crude models were adjusted for log<sub>10</sub> creatinine concentrations, and multivariable models were adjusted for age in years, sex (except stratified models), poverty income ratio (continuous), race/ethnicity (non-Hispanic white, non-Hispanic black, Mexican American, and other), survey cycle year (2005-2006, 2007-2008, 2009-2010, 2011-2012, and 2013-2014), and log<sub>10</sub>-transformed creatinine, triclosan, bisphenol A, and 2,5-dichlorophenol concentrations.

†*P* < .05.
